# Supplementary material for: ImmunoPET with Anti-Mesothelin Antibody in Patients with Pancreatic and Ovarian Cancer before Anti-Mesothelin Antibody–Drug Conjugate Treatment
Source: Oxford University Press journal article supplement (doi:10.1158/1078-0432.ccr-15-1272), 2015-11-20
Supplement: 10780432ccr151272-sup-150218_2_supp_0_nxxvfr.docx [file 10780432ccr151272-sup-150218_2_supp_0_nxxvfr.docx]

Legend Suppl. Figure 1:

1. PET uptake in the circulation per cohort, as determined by region of interest drawn in left ventricle; cohort 1 (in blue) contained 2 patients (0 mg additional MMOT0530A), cohort 2 (in green) contained 9 patients (10 mg additional MMOT0530A). On X axis the different PET moments: 2, 4 and 7 days post injection. On the Y axis the mean SUVmax per cohort.
2. PET uptake in the liver per patient. On X axis the different PET moments: 2, 4 and 7 days post injection. On the Y axis the SUVmax per patient.
3. PET uptake in one kidney per patient. On X axis the different PET moments: 2, 4 and 7 days post injection. On the Y axis the SUVmax per patient.
